# Supplementary material
Source: HighWire-hosted journal article supplement (https://bjo.bmj.com/content/bjo-2023-323468)
Supplement: inline-supplementary-material-1 [file inline-supplementary-material-1.pdf]

**Supplement Table 1 Age- and gender-specific percentiles of baseline spherical equivalent distribution among participants (including negative progression)**

| Age(yrs) | N    | Boys (N=2331)                            |                             |       |       |       |       | Girls (N=1948)                           |                             |       |       |       |       |
|----------|------|------------------------------------------|-----------------------------|-------|-------|-------|-------|------------------------------------------|-----------------------------|-------|-------|-------|-------|
|          |      | Raw Percentiles<br><i>P50 (P25, P75)</i> | Estimated Percentiles (LMS) |       |       |       |       | Raw Percentiles<br><i>P50 (P25, P75)</i> | Estimated Percentiles (LMS) |       |       |       |       |
|          |      |                                          | P2.5                        | P25   | P50   | P75   | P97.5 |                                          | P2.5                        | P25   | P50   | P75   | P97.5 |
| 3        | 317  | 1.00 (0.50, 1.50)                        | -1.99                       | 0.31  | 0.96  | 1.36  | 2.91  | 1.00 (0.50, 1.63)                        | -1.69                       | 0.51  | 1.13  | 1.62  | 3.51  |
| 4        | 594  | 1.00 (0.50, 1.38)                        | -1.98                       | 0.32  | 0.96  | 1.37  | 2.92  | 1.13 (0.75, 1.63)                        | -1.71                       | 0.49  | 1.11  | 1.60  | 3.49  |
| 5        | 322  | 1.00 (0.50, 1.38)                        | -1.99                       | 0.30  | 0.95  | 1.35  | 2.90  | 1.00 (0.75, 1.50)                        | -1.79                       | 0.40  | 1.03  | 1.52  | 3.41  |
| 6        | 508  | 0.75 (0.25, 1.25)                        | -2.09                       | 0.20  | 0.85  | 1.26  | 2.81  | 1.00 (0.50, 1.47)                        | -1.96                       | 0.24  | 0.86  | 1.35  | 3.24  |
| 7        | 910  | 0.75 (0.25, 1.25)                        | -2.24                       | 0.05  | 0.70  | 1.11  | 2.66  | 0.75 (0.13, 1.13)                        | -2.20                       | 0.00  | 0.62  | 1.12  | 3.00  |
| 8        | 1080 | 0.25 (-0.50, 0.88)                       | -2.44                       | -0.15 | 0.50  | 0.91  | 2.46  | 0.25 (-0.38, 0.88)                       | -2.44                       | -0.24 | 0.38  | 0.87  | 2.76  |
| 9        | 164  | 0.38 (-0.59, 0.75)                       | -2.62                       | -0.32 | 0.33  | 0.73  | 2.28  | 0.31 (-1.22, 0.75)                       | -2.63                       | -0.43 | 0.19  | 0.68  | 2.57  |
| 10       | 50   | 0.06 (-1.28, 0.75)                       | -2.78                       | -0.48 | 0.17  | 0.57  | 2.12  | 0.50 (-0.72, 0.97)                       | -2.85                       | -0.65 | -0.03 | 0.46  | 2.35  |
| 11       | 50   | 0.25 (-1.63, 0.50)                       | -2.96                       | -0.67 | -0.02 | 0.39  | 1.94  | 0.25 (-1.75, 0.63)                       | -3.15                       | -0.96 | -0.34 | 0.16  | 2.05  |
| 12       | 65   | -0.13 (-0.88, 0.75)                      | -3.19                       | -0.90 | -0.25 | 0.16  | 1.70  | -0.50 (-1.91, 0.03)                      | -3.57                       | -1.37 | -0.75 | -0.26 | 1.63  |
| 13       | 56   | -0.88 (-2.00, 0.50)                      | -3.49                       | -1.20 | -0.55 | -0.14 | 1.41  | -2.06 (-3.44, -0.56)                     | -4.08                       | -1.89 | -1.27 | -0.77 | 1.12  |
| 14       | 21   | -1.00 (-1.75, 0.25)                      | -3.84                       | -1.55 | -0.90 | -0.49 | 1.06  | -0.38 (-1.31, 0.19)                      | -4.67                       | -2.48 | -1.86 | -1.36 | 0.53  |
| 15       | 83   | -3.13 (-3.84, -0.91)                     | -4.22                       | -1.93 | -1.28 | -0.87 | 0.67  | -3.00 (-5.25, -1.50)                     | -5.31                       | -3.11 | -2.49 | -2.00 | -0.11 |
| 16       | 62   | -2.94 (-4.13, -1.25)                     | -4.62                       | -2.32 | -1.67 | -1.27 | 0.28  | -4.19 (-5.34, -0.78)                     | -5.96                       | -3.76 | -3.14 | -2.65 | -0.76 |

**Supplement Table 2 Age-specific Refractive distribution and progression in myopes and non-myopes (including negative progression)**

| Age (yrs) | N    | Myopes (N=745)                       |                                               | Non-myopes (N=3541)                  |                                               |
|-----------|------|--------------------------------------|-----------------------------------------------|--------------------------------------|-----------------------------------------------|
|           |      | Baseline SE<br><i>P50 (P25, P75)</i> | One-year progression<br><i>P50 (P25, P75)</i> | Baseline SE<br><i>P50 (P25, P75)</i> | One-year progression<br><i>P50 (P25, P75)</i> |
| 3         | 317  | -0.75 (-1.13, -0.63)                 | -1.50 (-2.75, -0.25)                          | 1.00 (0.53, 1.50)                    | -0.13 (-0.50, 0.25)                           |
| 4         | 594  | -1.25 (-1.88, -0.63)                 | -0.88 (-2.25, -0.38)                          | 1.13 (0.63, 1.50)                    | 0.00 (-0.25, 0.25)                            |
| 5         | 322  | -0.88 (-0.94, -0.75)                 | 0.13 (-1.06, 0.56)                            | 1.00 (0.75, 1.50)                    | 0.00 (-0.25, 0.25)                            |
| 6         | 508  | -0.75 (-1.25, -0.63)                 | 0.00 (-1.25, 1.25)                            | 1.00 (0.50, 1.38)                    | 0.25 (-0.13, 0.63)                            |
| 7         | 910  | -0.88 (-1.5, -0.63)                  | 0.63 (-0.13, 1.13)                            | 0.88 (0.50, 1.25)                    | 0.25 (0.00, 0.75)                             |
| 8         | 1080 | -1.38 (-2.25, -0.88)                 | 0.75 (0.38, 1.13)                             | 0.63 (0.13, 1.00)                    | 0.25 (0.00, 0.75)                             |
| 9         | 164  | -1.75 (-2.75, -0.97)                 | 0.75 (0.50, 1.00)                             | 0.63 (0.38, 1.00)                    | 0.25 (0.13, 0.50)                             |
| 10        | 50   | -1.75 (-2.00, -1.00)                 | 0.75 (0.50, 1.13)                             | 0.75 (0.25, 1.00)                    | 0.25 (0.13, 0.63)                             |
| 11        | 50   | -2.25 (-2.88, -1.63)                 | 0.88 (0.66, 1.00)                             | 0.50 (0.25, 0.75)                    | 0.25 (0.13, 0.50)                             |
| 12        | 65   | -1.88 (-2.75, -0.88)                 | 0.75 (0.50, 1.00)                             | 0.50 (0.00, 0.75)                    | 0.25 (0.00, 0.50)                             |
| 13        | 56   | -2.63 (-3.81, -1.63)                 | 0.63 (0.25, 0.88)                             | 0.50 (0.28, 0.75)                    | 0.25 (0.00, 0.47)                             |
| 14        | 21   | -1.50 (-2.28, -1.19)                 | 0.56 (0.25, 0.75)                             | 0.25 (0.25, 0.88)                    | 0.25 (-0.25, 0.25)                            |
| 15        | 83   | -3.50 (-5.25, -2.00)                 | 0.38 (0.13, 0.63)                             | 0.19 (-0.06, 0.69)                   | 0.38 (0.13, 0.41)                             |
| 16        | 62   | -3.94 (-5.16, -2.22)                 | 0.38 (0.25, 0.63)                             | 0.00 (-0.06, 0.75)                   | 0.13 (0.00, 0.38)                             |

**Supplement Table 3 Age-specific means of refractive progression and the standard value of hyperopia reserve by backward calculation (including negative progression)**

| Age (yrs) | N   | Refractive progression<br><i>Mean ± SD</i> | Hyperopia reserve<br><i>mean</i> | Hyperopia reserve<br><i>range</i> | Proportion of baseline participants that fall within the hyperopia reserve range (%) |
|-----------|-----|--------------------------------------------|----------------------------------|-----------------------------------|--------------------------------------------------------------------------------------|
| 3         | 302 | -0.14 ± 0.62                               | 1.16                             | (0.54, 1.78)                      | 61.3                                                                                 |
| 4         | 578 | -0.04 ± 0.57                               | 1.30                             | (0.73, 1.87)                      | 61.2                                                                                 |
| 5         | 311 | -0.02 ± 0.49                               | 1.34                             | (0.85, 1.83)                      | 52.4                                                                                 |
| 6         | 479 | 0.20 ± 0.60                                | 1.36                             | (0.76, 1.96)                      | 46.1                                                                                 |
| 7         | 787 | 0.21 ± 0.56                                | 1.16                             | (0.60, 1.72)                      | 57.9                                                                                 |
| 8         | 815 | 0.21 ± 0.43                                | 0.95                             | (0.52, 1.38)                      | 43.4                                                                                 |
| 9         | 112 | 0.21 ± 0.25                                | 0.74                             | (0.49, 0.99)                      | 39.3                                                                                 |
| 10        | 33  | 0.21 ± 0.16                                | 0.53                             | (0.37, 0.69)                      | 15.2                                                                                 |
| 11        | 32  | 0.18 ± 0.18                                | 0.32                             | (0.14, 0.50)                      | 40.6                                                                                 |
| 12        | 36  | 0.12 ± 0.21                                | 0.14                             | (-0.07, 0.35)                     | 22.2                                                                                 |
| 13        | 22  | 0.16 ± 0.20                                | 0.02                             | (-0.18, 0.22)                     | 4.5                                                                                  |
| 14        | 9   | 0.10 ± 0.28                                | -0.14                            | (-0.42, 0.14)                     | 22.2                                                                                 |
| 15        | 12  | 0.18 ± 0.21                                | -0.24                            | (-0.45, -0.03)                    | 25.0                                                                                 |
| 16        | 12  | 0.08 ± 0.20                                | -0.42                            | (-0.50, -0.22)                    | 18.2                                                                                 |
| 17        |     |                                            | -0.50                            | >-0.5                             |                                                                                      |
